# Supplementary material
Source: Springer Nature journal article supplement (https://www.springermedizin.de/resource/supplementary/13049_2012_552_MOESM1_ESM.pdf/9666806)
Supplement: MOESM1 [file 9666806]

**FINNMARK**  
2000 – 2004

**HORDALAND**  
2003 – 2004

Cause of death  
ICD-10 V01 – Y81

n = 207

n = 434

Excluded

*Poisonings*

*Simple fractures*

*In patients aged > 64 years*

n = 67

23 poisonings

44 patients aged > 64 with simple fractures

n = 195

69 poisonings

126 patients aged > 64 years with simple fractures

All trauma except simple fractures in patients aged > 64 years and poisonings

n = 140

n = 217

No information in patient journal, police report, or autopsy report

n = 18

n = 26

Division into urban or rural subgroup

n = 122

n = 191

n = 4  
Urban/rural location unestablished

Included in analysis

**Rural**  
n = 122

**Urban**  
n = 89

**Rural**  
n = 98
